# Supplementary material for: Gene Expression Comparison Between the Lymph Node-Positive and Negative Reveals a Peculiar Immune-microenvironment Signature and a Theranostic Role for WNT Targeting in Pancreatic Ductal Adenocarcinoma: A Pilot Study
Source: Preprints.org preprint supplement (doi:10.20944/preprints201906.0228.v1), 2019-06-22
Supplement: Supplementary file 1 [file supplementary]

OS

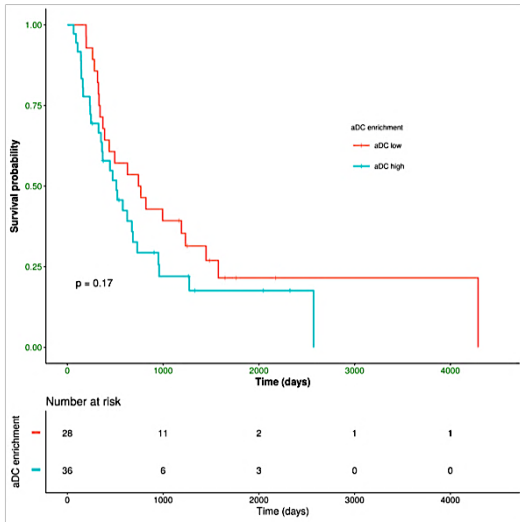

RFS

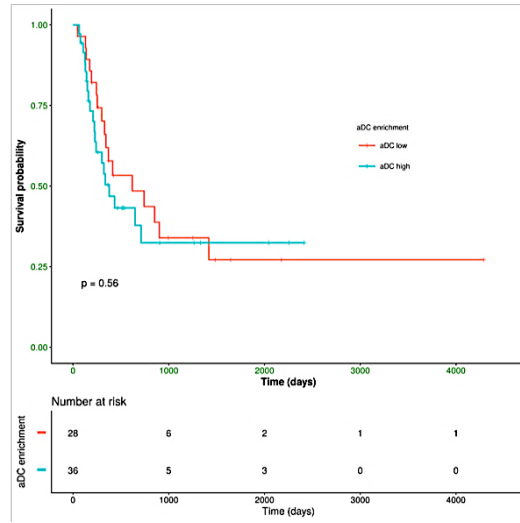

**Supplementary Figure 1.** Survival curves for OS and RFS comparing  $N^{\text{pos}}$  patients stratified according to aDC enrichments.

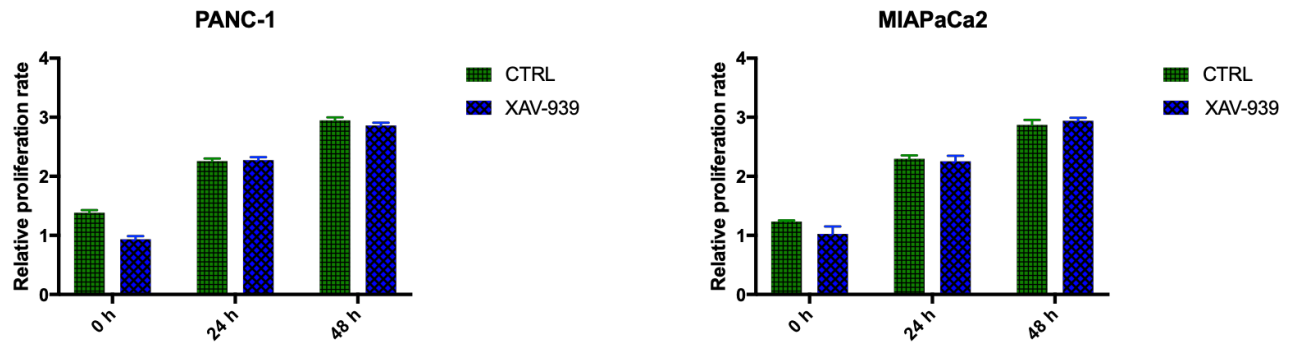

**Supplementary Figure 2.** The proliferation of PANC-1 and MIAPaca-2 after XAV-939 treatment was evaluated by MTT assay at 0, 24, 48 h. Bars represent the mean  $\pm$  SD, n = 5.

**Supplementary Table 1.** Gene Expression profile summary comparison between survival characteristics from 176 patients divided in high- and low-expressers from TCGA dataset [62-64].

|                  | <b>Total cohort patients<br/>(n=176)</b> |                                             |
|------------------|------------------------------------------|---------------------------------------------|
| <b>Gene</b>      | <b><i>P</i> score</b>                    | <b>5-years<br/>survival<br/>high vs low</b> |
| <b>WNT-2</b>     | <b>0.014</b>                             | 10% vs 36%<br>(n=133 vs 43)                 |
| <b>ANGPTL4</b>   | <b>0.0097</b>                            | 20% vs 53%<br>(n=137 vs 39)                 |
| <b>Dkk-1</b>     | <b>0.00013</b>                           | 19% vs 57%<br>(n=135 vs 41)                 |
| <b>FGF basic</b> | <b>0.00098</b>                           | 9% vs 36%<br>(n=48 vs 128)                  |
| <b>MST1</b>      | <b>0.00071</b>                           | 53% vs 12%<br>(n=49 vs 127)                 |
|                  |                                          |                                             |
